# Supplementary material
Source: publisher site journal article supplement (https://www.dovepress.com/article/205820)
Supplement: Supplementary file 1 [file get_supplementary_file.php]

**Appendix 1.** Jadad score details. The Jadad scale assesses the quality of clinical trials, based methods relevant to random assignment, double blinding, and the flow of patients. The scale comprises 7 items. The last 2 attract a negative score, which means that the range of possible scores is 0 (bad) to 5 (good). Four studies scored a 2, because the generation of the randomisation scheme was not properly described and because the design was not double-blind; 1 study scored a 3 because the design was not double-blind; 2 study scored a 4 because the generation of the randomisation scheme was not properly described; 1 study scored the maximum, 5.

| Study | 1. Randomized  (+1 point) | 2. Randomisation properly described  (+1 point) | 3. Double blind  (+1 point) | 4. Double blinding appropriately described  (+1 point) | 5. Description of withdrawals and drop-outs  (+1 point) | 6. Inappropriate randomization  (-1 point) | 7. Double blinding inappropriate  (-1 point) | Total score |
| --- | --- | --- | --- | --- | --- | --- | --- | --- |
| **Studies in streptococcal pharyngitis (n=5)** | | | | | | | | |
| M86-008 | +1 | NO | +1 | +1 | +1 | NO | NO | 4 |
| M86-030 | +1 | NO | NO | NA | +1 | NO | NA | 2 |
| M85-129 | +1 | NO | +1 | +1 | +1 | NO | NO | 4 |
| M86-047 | +1 | NO | NO | NA | +1 | NO | NA | 2 |
| M88-165 | +1 | +1 | +1 | +1 | +1 | NO | NO | 5 |
